# Supplementary material for: The Intergenerational Transmission of Anxiety: A Children-of-Twins Study
Source: Atypon-hosted journal article supplement (doi:10.1176/appi.ajp.2015.14070818), 2015-04-24

Supplementary Material

Figure 1. The final, constrained model for anxiety.

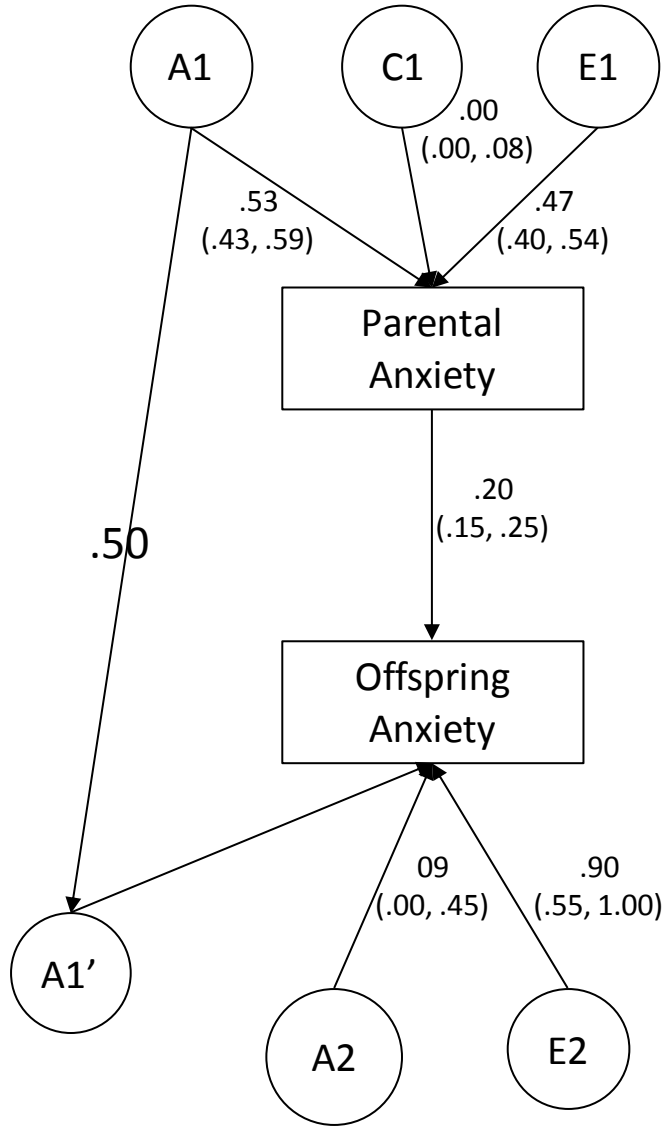

Figure 2. The final, constrained model for neuroticism.

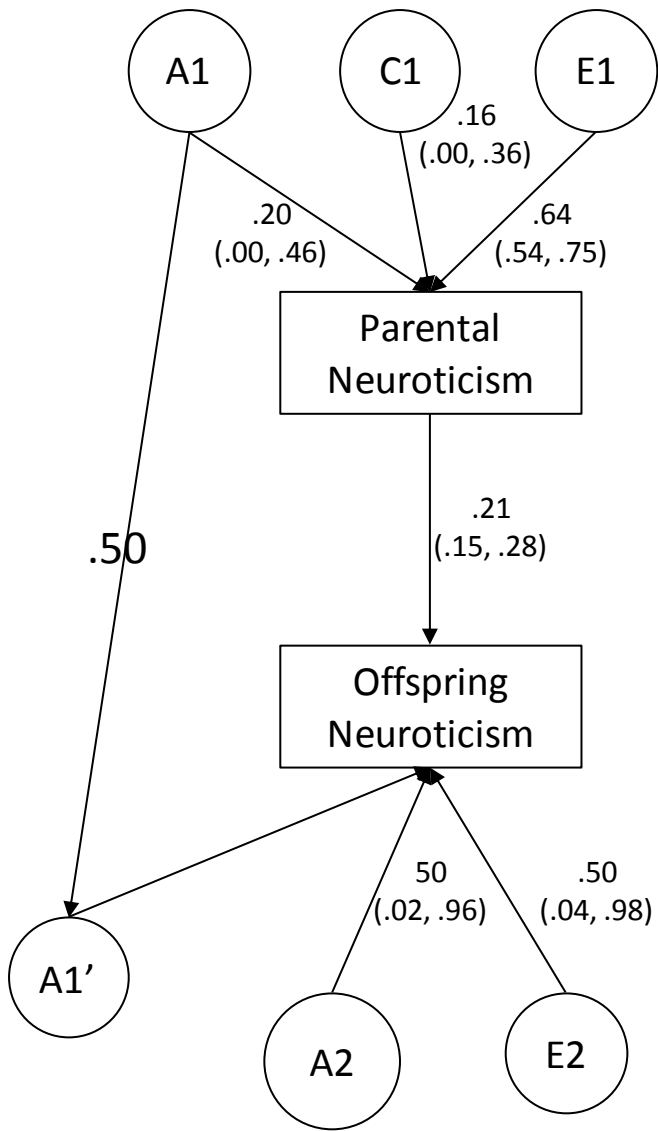

Supplement: appi.ajp.2015.14070818.ds001.pdf [file appi.ajp.2015.14070818.ds001.pdf]
